# Supplementary material for: Genomic Characterization of Antibiotic-Resistant Campylobacterales Isolated from Chilean Poultry Meat
Source: MDPI journal article supplement (doi:10.3390/antibiotics12050917), 2023-05-16
Supplement: s1 [file s1]

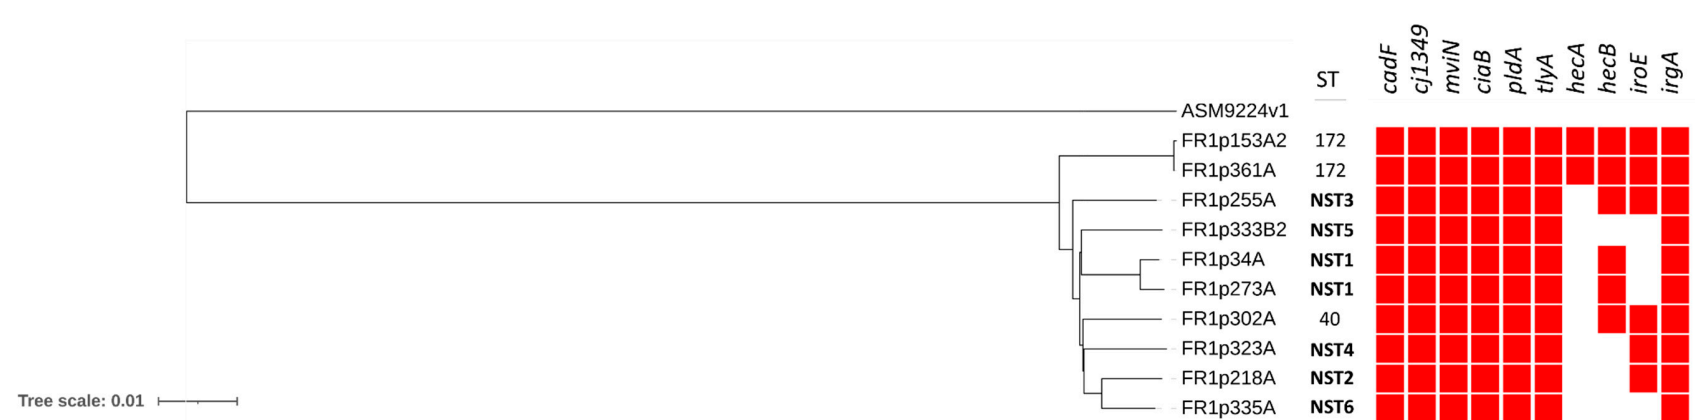

Figure S2. Phylogenetic tree based on whole-genome sequencing generated with Genome Blast Distance Phylogeny (GBDP). The presence or lack of virulence of antibiotic-resistant *Arcobacter butzleri* is indicated by the presence or absence of red block, respectively. NST: New Sequence Type. NST are in bold type. Bar, 0.01.
