# Supplementary material for: Genomic Characterization of Antibiotic-Resistant Campylobacterales Isolated from Chilean Poultry Meat
Source: MDPI journal article supplement (doi:10.3390/antibiotics12050917), 2023-05-16
Supplement: s1 [file s1]

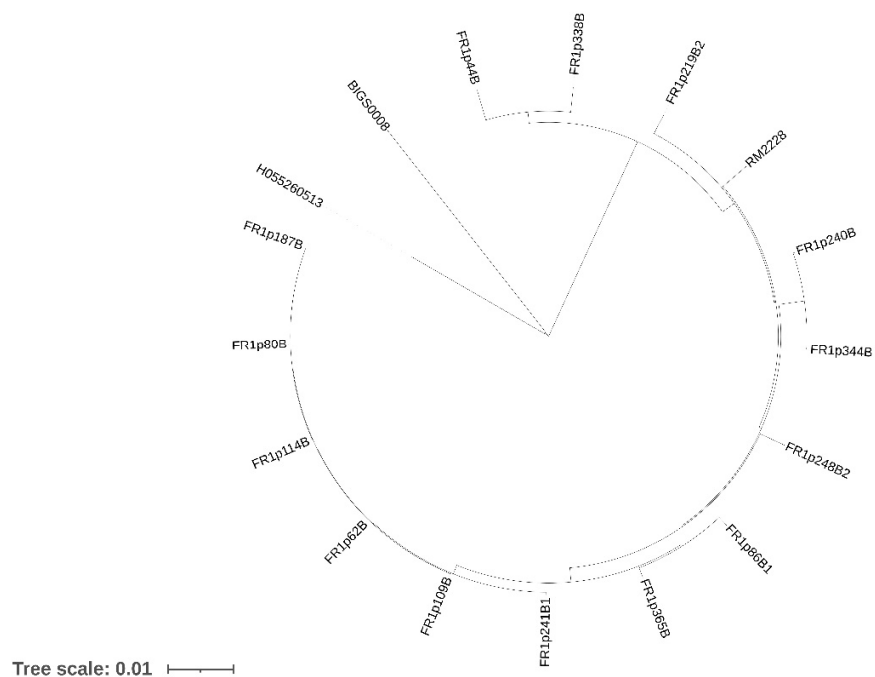

Figure S3. Phylogenetic tree based on whole-genome sequencing generated with Genome Blast Distance Phylogeny (GBDP). This shows the clade to which the *C. coli* strains isolated in this study belong. RM2228 belongs to clade 1, H055260513 to clade 2 and BIGS0008 to clade 3. Bar, 0.01
