# Supplementary material for: Genomic Characterization of Antibiotic-Resistant Campylobacterales Isolated from Chilean Poultry Meat
Source: Antibiotics (Basel). 2023 May 16;12(5):917. doi: 10.3390/antibiotics12050917 (PMC10215856; doi:10.3390/antibiotics12050917)
Supplement: Supplementary file 1 [file antibiotics-12-00917-s001.zip › Table S1.xlsx]

## Sheet: genome assemblies
Table S1. Comparison of contiguity and annotation of genomes assemblies by different approaches
		Unicycler											SPAdes
	Sample	Contiguity				Correctness			Completenes				Contiguity				Correctness			Completenes
		Contigs	N50	L50	%GC	Misassemblies	Mismatches	Indels	Number of genes	Orthologous gene score		CDS	Contigs	N50	L50	%GC	Misassemblies	Mismatches	Indels	Number of genes	Orthologous gene score		CDS
Campylobacter jejuni	66B.2	18	154025	3	30.46	15	17201	573	1794	34	85	1751	25	116025	4	30.45	14	17317	562	1800	35	87.5	1757
	96B	19	248094	3	30.24	18	19158	685	1852	34	85	1809	22	248256	3	30.24	18	19352	688	1857	35	87.5	1814
	115B	39	243597	3	30.15	24	17923	566	1877	35	87.5	1834	42	176371	4	30.14	26	17991	567	1898	34	85	1855
	118B	15	322836	2	30.31	18	18099	546	1850	35	87.5	1807	14	322964	2	30.31	18	18315	552	1858	34	85	1815
	121B	19	289323	3	30.28	16	17755	613	1772	35	87.5	1729	21	182583	4	30.30	16	17931	626	1785	34	85	1741
	122B	14	293374	2	30.45	5	6946	297	1701	34	85	1657	14	293511	2	30.45	5	6999	301	1701	35	87.5	1657
	134B	42	145422	5	30.13	16	18083	507	1883	35	87.5	1844	57	121482	6	30.10	15	18148	511	1911	34	85	1868
	138B	28	179533	4	30.37	12	18558	590	1817	35	87.5	1774	28	199600	4	30.37	13	18647	600	1834	34	85	1791
	169B	17	286686	3	30.28	15	18249	679	1784	34	85	1741	20	188108	4	30.32	17	18335	672	1789	35	87.5	1742
	181B	17	154053	3	30.49	12	17020	552	1671	34	85	1628	23	116031	4	30.48	13	17377	562	1684	35	87.5	1647
	186B	38	206990	4	30.22	19	18302	550	1935	35	87.5	1872	42	152543	5	30.21	19	18414	553	1960	35	87.5	1920
	191B	15	154405	3	30.45	11	12226	379	1770	35	87.5	1723	15	154533	3	30.42	12	12268	382	1773	35	87.5	1730
	201B	25	251647	3	30.10	20	18452	525	1872	34	85	1825	33	176496	4	30.07	19	18575	537	1890	35	87.5	1847
	234B	21	155451	4	30.22	15	19219	610	1789	34	85	1746	25	125796	5	30.22	13	19251	589	1793	35	87.5	1751
	248B.1	20	154507	3	30.38	7	9006	310	1795	34	85	1752	21	146973	4	30.36	7	9103	313	1798	34	85	1755
	268B	12	845061	1	30.34	18	18547	602	1722	35	87.5	1679	12	230942	2	30.38	19	18735	613	1724	35	87.5	1682
	283B.1	19	154448	3	30.41	8	8869	319	1795	35	87.5	1752	19	154602	3	30.40	8	9195	345	1806	35	87.5	1763
	341B.1	11	374456	2	30.36	16	18804	618	1728	35	87.5	1691	13	401041	2	30.36	14	18847	599	1741	35	87.5	1698
	361B.1	8	296324	2	30.31	17	18584	639	1750	34	85	1707	10	178220	4	30.31	16	18594	640	1753	33	82.5	1710
Campylobacter coli	44B	23	141319	5	31.33	17	15556	571	1832	35	87.5	1789	25	116951	6	31.32	17	15755	600	1840	35	87.5	1796
	62B.2	31	169416	4	31.02	14	10798	402	1869	35	87.5	1826	36	169610	4	31.01	18	11001	413	1882	35	87.5	1839
	80B	34	169456	4	31.02	17	10821	403	1868	35	87.5	1825	36	169696	4	31.01	18	11023	420	1882	35	87.5	1838
	86B.1	41	169417	3	30.91	18	10188	399	2001	35	87.5	1958	49	139777	5	30.91	17	10272	399	2013	35	87.5	1975
	109B	34	264298	3	31.03	17	10969	407	1868	35	87.5	1825	35	264452	3	31.01	19	11137	420	1878	35	87.5	1841
	114B	32	169416	4	31.03	14	10811	402	1867	35	87.5	1824	37	169696	4	31.01	18	11030	419	1882	35	87.5	1839
	187B	35	169416	4	31.03	16	10797	399	1866	35	87.5	1823	36	169696	4	31.01	17	11011	410	1883	35	87.5	1840
	219B.2	15	208191	3	31.40	15	9758	341	1704	35	87.5	1661	15	209052	3	31.40	15	9920	352	1708	35	87.5	1665
	240B	33	125768	5	31.23	12	9772	323	1889	35	87.5	1846	32	125906	5	31.24	11	9343	308	1868	35	87.5	1825
	241B.1	35	169416	4	31.04	16	10982	415	1861	35	87.5	1818	34	169696	4	31.02	18	11265	433	1878	35	87.5	1841
	248B.2	23	142638	4	31.27	7	9011	374	1839	35	87.5	1796	23	141832	4	31.27	8	9190	393	1842	35	87.5	1801
	338B	50	156590	5	31.15	18	14741	603	1853	35	87.5	1809	50	156351	5	31.13	18	14876	605	1870	35	87.5	1826
	344B	28	141340	5	31.28	14	9135	328	1827	35	87.5	1785	32	129025	5	31.27	13	9483	348	1829	35	87.5	1786
	365B	34	169828	4	31.05	13	9533	340	1915	35	87.5	1872	38	141873	4	31.04	13	9642	349	1922	35	87.5	1879
Arcobacter butzleri	34A	21	291654	3	26.90	75	34170	550	2251	36	90	2203	24	189783	5	26.90	73	34182	555	2245	36	90	2204
	153A.2	36	157623	5	26.73	59	41924	737	2439	36	90	2387	56	105938	7	26.72	56	42001	749	2423	37	92.5	2379
	218A	68	77652	11	26.84	71	36052	597	2286	36	90	2238	69	76625	11	26.86	70	36049	603	2294	36	90	2253
	255A	83	46144	17	26.95	75	35495	545	2253	37	92.5	2203	83	46297	17	26.98	73	35539	545	2272	36	90	2228
	273A	40	135209	6	26.89	72	35171	551	2457	36	90	2413	50	112870	6	26.89	70	35244	570	2461	36	90	2421
	302A	30	173606	5	26.97	75	35331	626	2229	36	90	2180	31	173760	5	26.98	74	35272	623	2235	36	90	2188
	323A	41	114812	7	26.82	66	36360	593	2307	36	90	2259	42	114966	7	26.81	65	36458	601	2316	36	90	2271
	333B.2	38	148424	5	26.97	72	34872	630	2128	36	90	2080	42	122472	6	26.97	70	34989	648	2125	36	90	2082
	335A	66	91306	9	26.89	77	35369	607	2221	35	87.5	2172	69	80458	9	26.90	75	35492	636	2245	36	90	2199
	361A	38	156903	6	26.75	60	41893	736	2396	36	90	2348	47	111734	7	26.75	59	42010	749	2398	37	92.5	2351
